# Supplementary material
Source: Springer Nature journal article supplement (https://www.springermedizin.de/resource/supplementary/13012_2014_788_MOESM4_ESM.pdf/9630694)
Supplement: MOESM4 [file 9630694]

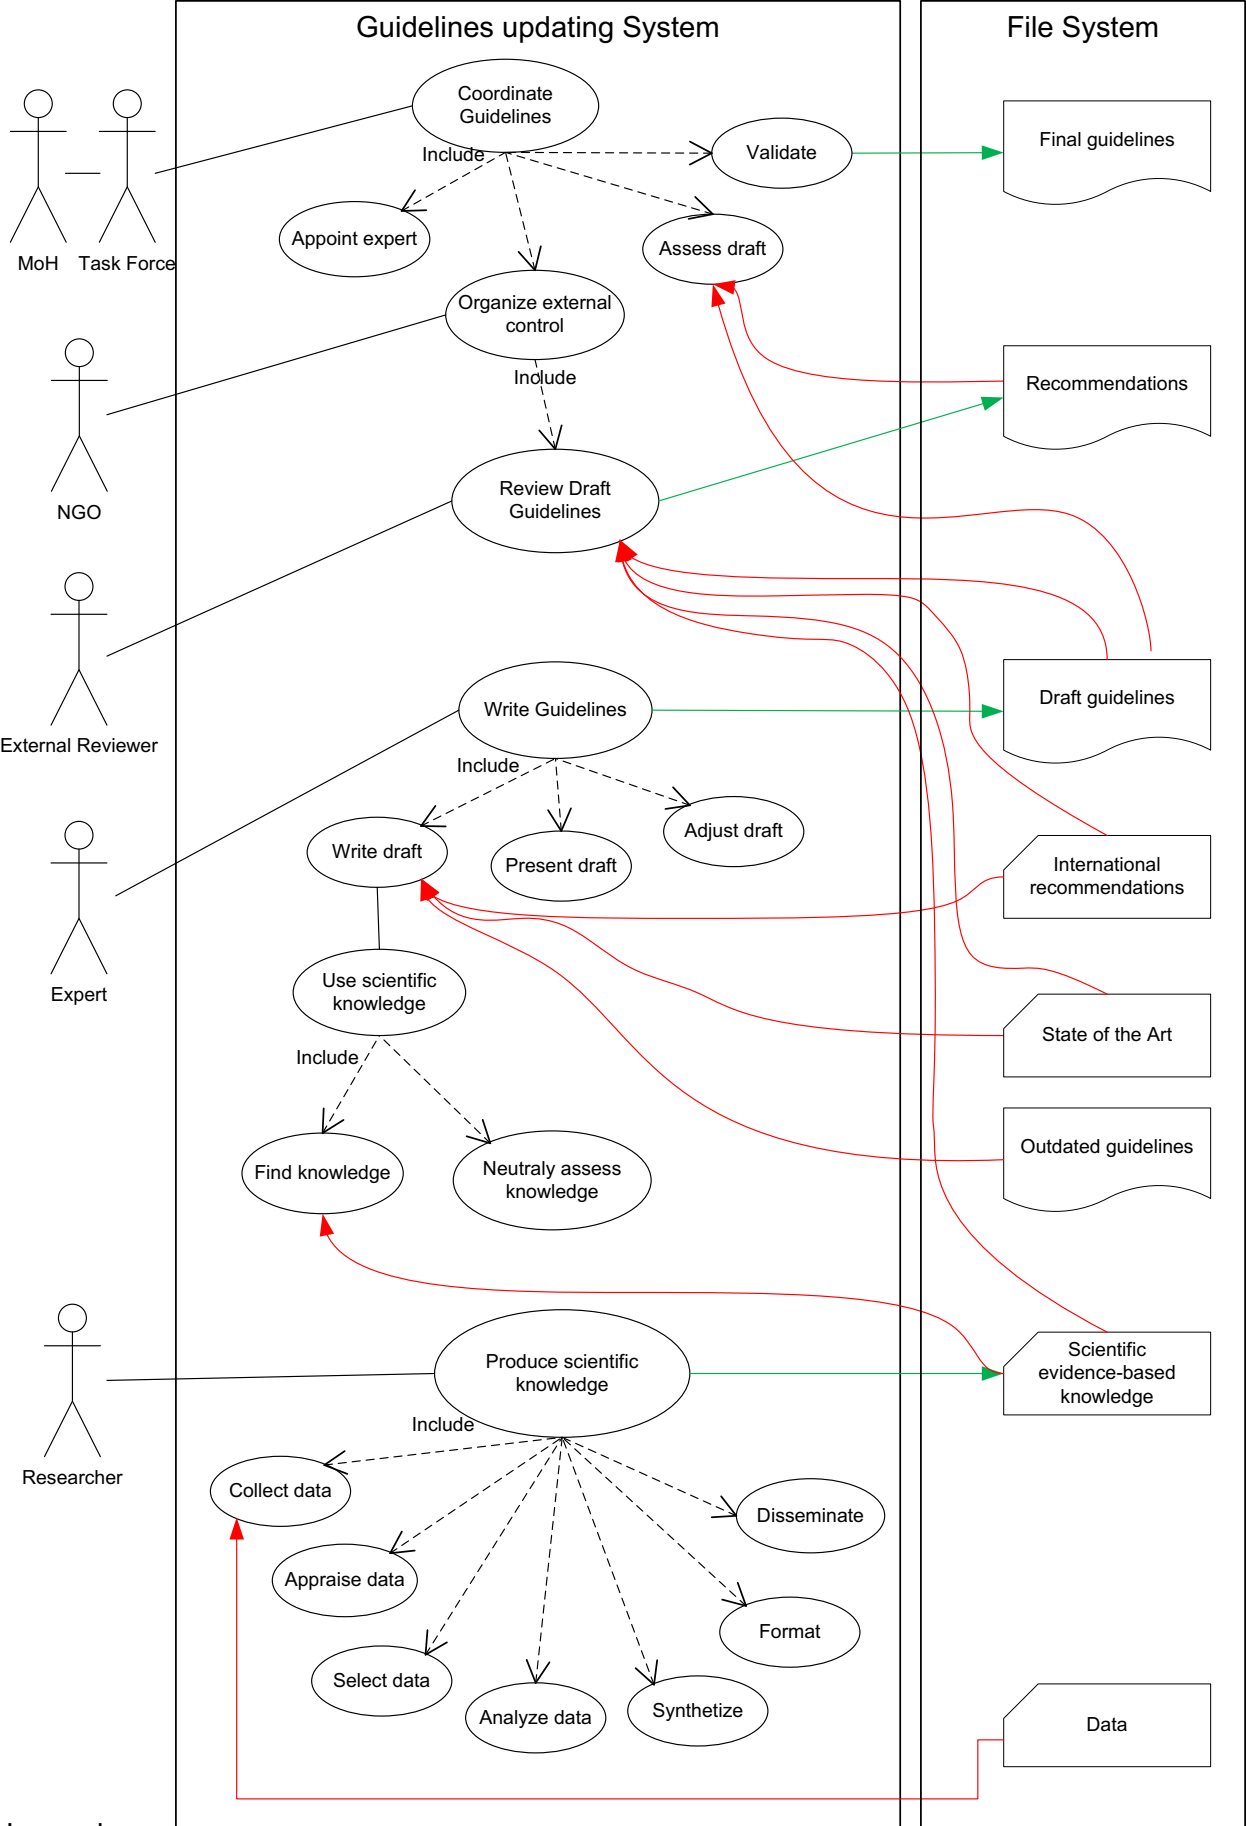

**Legend**

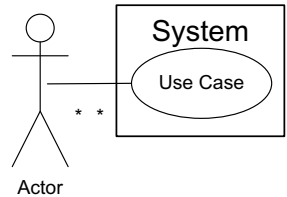

Actor: human or not human user which interacts with the users within the system

Use case: activity that interacts with actors within the system

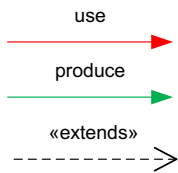

Relationships: define how an actor participates in a use case.
